# Supplementary material for: Biosynthesis of Bacterial Nanocellulose from Low-Cost Cellulosic Feedstocks: Effect of Microbial Producer
Source: MDPI journal article supplement (doi:10.3390/ijms241814401), 2023-09-21
Supplement: s1 [file s1]

## Supplementary Materials

# Biosynthesis of Bacterial Nanocellulose from Low-Cost Cellulosic Feedstocks: Effect of Microbial Producer

Ekaterina A. Skiba <sup>1,\*</sup>, Nadezhda A. Shavyrkina <sup>1</sup>, Maria A. Skiba <sup>2</sup>, Galina F. Mironova <sup>1</sup>  
and Vera V. Budaeva <sup>1,\*</sup>

<sup>1</sup> Laboratory of Bioconversion, Institute for Problems of Chemical and Energetic Technologies, Siberian Branch of the Russian Academy of Sciences (IPCET SB RAS), 659322 Biysk, Russia; 32nadina@mail.ru (N.A.S.); yur\_galina@mail.ru (G.F.M.)

<sup>2</sup> Higher Chemical College of the Russian Academy of Sciences, Mendeleev University of Chemical Technology of Russia, 9, Miusskaya Square, 125047 Moscow, Russia; skibamaria21@gmail.com

\* Correspondence: eas08988@mail.ru (E.A.S.); budaeva@ipcet.ru (V.V.B.)

## Table of Contents

|                                                                                           |          |
|-------------------------------------------------------------------------------------------|----------|
| <b>Table S1.</b> Absorption band assignments                                              | <b>2</b> |
| Chemical pretreatment of plant feedstocks                                                 | <b>3</b> |
| <b>Table S2.</b> Chemical compositions of <i>Miscanthus</i> , oat hulls and pulps         | <b>3</b> |
| Enzymatic hydrolysis of pulps                                                             | <b>4</b> |
| <b>Table S3.</b> Enzymatic hydrolysis results for <i>Miscanthus</i> , oat hulls and pulps | <b>5</b> |

**Table S1.** Absorption band assignments for functional groups of the BNC samples obtained from oat hulls and *Miscanthus* using individual *Komagataeibacter xylinus* strains and symbiotic culture.

| Absorption band assignment*                                                                                | Absorption band peak, cm <sup>-1</sup> |      |         |                                 |      |         |                                  |              |              |
|------------------------------------------------------------------------------------------------------------|----------------------------------------|------|---------|---------------------------------|------|---------|----------------------------------|--------------|--------------|
|                                                                                                            | <i>Komagataeibacter xylinus</i>        |      |         | <i>Komagataeibacter xylinus</i> |      |         | <i>Medusomyces gisevii</i> Sa-12 |              |              |
|                                                                                                            | B-12429                                |      |         | B-12431                         |      |         |                                  |              |              |
|                                                                                                            | MH                                     | OHH  | Control | MH                              | OHH  | Control | MH                               | OHH          | Control      |
| v OH groups involved in intermolecular and intramolecular H-bonding                                        | 3413                                   | 3435 | 3368    | 3411                            | 3415 | 3379    | 3335                             | 3432         | 3429         |
| v bonds in CH and CH <sub>2</sub> groups                                                                   | 2916                                   | 2916 | 2916    | 2914                            | 2917 | 2915    | 2919                             | 2921         | 2920         |
| δ HOH bonds due to tightly bound water present                                                             | 1645                                   | 1639 | 1647    | 1640                            | 1639 | 1641    | 1644                             | 1643<br>1532 | 1654<br>1638 |
| δ CH <sub>2</sub> groups                                                                                   | 1426                                   | 1426 | 1426    | 1426                            | 1426 | 1426    | 1429                             | 1431         | 1430         |
| δ OH groups in CH <sub>2</sub> OH                                                                          | 1372                                   | 1371 | 1369    | 1369                            | 1369 | 1369    |                                  | 1375         | 1375         |
|                                                                                                            | 1335                                   | 1335 | 1335    | 1335                            | 1336 | 1335    | 1316                             | –            | –            |
|                                                                                                            | 1315                                   | 1315 |         | 1315                            | 1316 | 1315    |                                  |              |              |
| δ CH <sub>2</sub> groups in CH <sub>2</sub> OH                                                             | 1278                                   |      |         | 1279                            | 1279 | 1279    |                                  | 1281         | 1282         |
|                                                                                                            | 1232                                   | 1278 | 1279    | 1247                            | 1248 | 1248    | 1280                             | 1249         | 1235         |
|                                                                                                            |                                        |      |         | 1233                            | 1233 | 1233    |                                  |              |              |
| δ OH groups                                                                                                | –                                      | –    | –       | –                               | 1203 | 1203    | 1203                             | 1204         | –            |
| v C-O bonds (bands typical of polysaccharides due to present C-O-C acetyl bonds and C-O bonds in alcohols) | 1161                                   | 1162 | 1160    | 1162                            | 1162 | 1162    | 1102                             |              | 1165         |
|                                                                                                            | 1057                                   | 1058 | 1109    | 1057                            | 1055 | 1060    | 992                              | 1102         | 1060         |
|                                                                                                            |                                        |      | 1057    | 1032                            | 1030 | 1033    |                                  |              |              |
| β-1,4 linkages                                                                                             | 894                                    | 894  | 850     | 896                             | 895  | 896     | 899                              | 899          | 899          |

1)\* v – stretching, δ – bending; MH – *Miscanthus* hydrolyzate; OHH – oat-hull hydrolyzate; 2) the controls were the Hestrin-Schramm medium for *Komagataeibacter xylinus* B-12429 and B-12431, and the synthetic medium supplemented with black tea extract for *Medusomyces gisevii* Sa-12 ; 3) some of data on BNCs synthesized by *Medusomyces gisevii* Sa-12 were reported previously [25,26].

## Chemical pretreatment of plant feedstocks [25]

The pretreatment was carried out under pilot production conditions at atmospheric pressure and 90–96 °C. A 250-L standard vessel was employed, and all the equipment and its piping are made of stainless steel.

The single feedstock loading was 10 kg. The pretreatment time was 14 h. The chopped *Miscanthus* or pristine oat hulls were pre-hydrolyzed with a 1% HNO<sub>3</sub> solution (AO KhimReaktiv, CAS No. 7697-32-7, Russia) at 96 °C for 1 h. Afterwards, the feedstocks were treated with a 4 % HNO<sub>3</sub> solution, washed with water, treated with a 4 % NaOH solution (OAO Kaustik, CAS No.1310-73-2, Russia), and then washed with water until natural wash waters. The resultant pulps were squeezed in a vacuum filter and used as substrates in the wet state for enzymatic hydrolysis.

Table S2 lists the chemical compositions of the feedstocks and the resultant pulps.

**Table S2.** Chemical compositions of *Miscanthus*, oat hulls and pulps [69].

| Measures                 | <i>Miscanthus</i> | <i>Miscanthus</i><br>pulp | Oat hulls | Oat-hull<br>pulp |
|--------------------------|-------------------|---------------------------|-----------|------------------|
| $\alpha$ -Cellulose, %   | 50.3±0.2          | 95.8±0.3                  | 44.9±0.2  | 94.2±0.2         |
| Pentosans, %             | 22.7±0.1          | 2.5±0.1                   | 31.4±0.1  | 3.8±0.1          |
| Acid-insoluble lignin, % | 21.4±0.1          | 1.5±0.1                   | 18.8±0.1  | 0.8±0.1          |
| Ash content, %           | 5.6±0.05          | 0.2±0.05                  | 4.9±0.05  | 1.2±0.05         |
| Total hydrolyzables, %   | 72.3±0.3          | 98.3±0.3                  | 76.3±0.3  | 97.8±0.3         |

## Enzymatic hydrolysis of pulps [69]

The enzymatic hydrolysis of the resultant substrates was run in an 11-L fermentor in an aqueous medium at  $47\pm 2^\circ\text{C}$  for 72 h by using the enzymes CelloLux-A (Sibbiopharm Ltd, Russia) and BrewZyme BGX (Tarchomin Pharmaceutical Works Polfa S.A., Poland) standardized against cellulase, xylanase and  $\beta$ -glucanase in compliance with their analytical datasheets. The enzyme cocktail was injected as follows: CelloLux-A 40 FPU/g solid and BrewZyme BGX 15 FPU/g solid. FPU was determined by the international procedure. The pH was maintained at  $4.7\pm 0.2$  with ammonium hydroxide (OOO KhimPostavka, CAS No. 1336-21-6, Russia) and orthophosphoric acid (OOO KhimSpetsializatsia, CAS No. 7664-38-2, Russia). The initial solid loading was 30 g/L.

The yield of reducing sugars (RS) was calculated by Eq. (1):

$$\eta_{\text{RS}} = \frac{C_{\text{F}} \cdot V_{\text{H}}}{m_{\text{S}}} \cdot 0.9 \cdot 100 \quad (1)$$

where  $\eta_{\text{RS}}$  is the RS yield on a solid weight basis (%);

$C_{\text{F}}$  is the final RS concentration in the hydrolyzate (g/L);

$V_{\text{H}}$  is the enzymatic hydrolyzate volume (L);

0.90 is the coefficient attributed to the water molecule addition to anhydroglucose residues of the corresponding monomer units as a result of enzymatic hydrolysis;

$m_{\text{S}}$  is the weight of the substrate for fermentation (g).

Table S3 summarizes enzymatic hydrolysis results for the feedstocks and pulps.

**Table S3.** Enzymatic hydrolysis results for *Miscanthus*, oat hulls and pulps.

| Measures                                   | <i>Miscanthus</i> | <i>Miscanthus</i><br>pulp | Oat hulls | Oat-hull<br>pulp |
|--------------------------------------------|-------------------|---------------------------|-----------|------------------|
| RS concentration, g/L                      | 4.1±0.1           | 26.7±0.2                  | 4.5±0.1   | 24.5±0.2         |
| RS yield on a substrate weight<br>basis, % | 11.1±0.3          | 72.1±0.3                  | 15.8±0.3  | 73.5±0.3         |
| Glucose concentration, g/L                 | 4.0±0.1           | 26.5±0.2                  | 4.4±0.1   | 22.3±0.2         |
| Xylose concentration, g/L                  | 0.10±0.05         | 0.20±0.05                 | 0.10±0.05 | 2.20±0.05        |
| Once standardized against reducing sugars  |                   |                           |           |                  |
| RS concentration, g/L                      | –                 | 20.0±0.2                  | –         | 20.0±0.2         |
| Xylose concentration, g/L                  | –                 | 0.15±0.05                 | –         | 1.80±0.05        |
